# Supplementary material
Source: Elsevier journal article supplement (https://authors.library.caltech.edu/38390/9/mmc2.pdf)

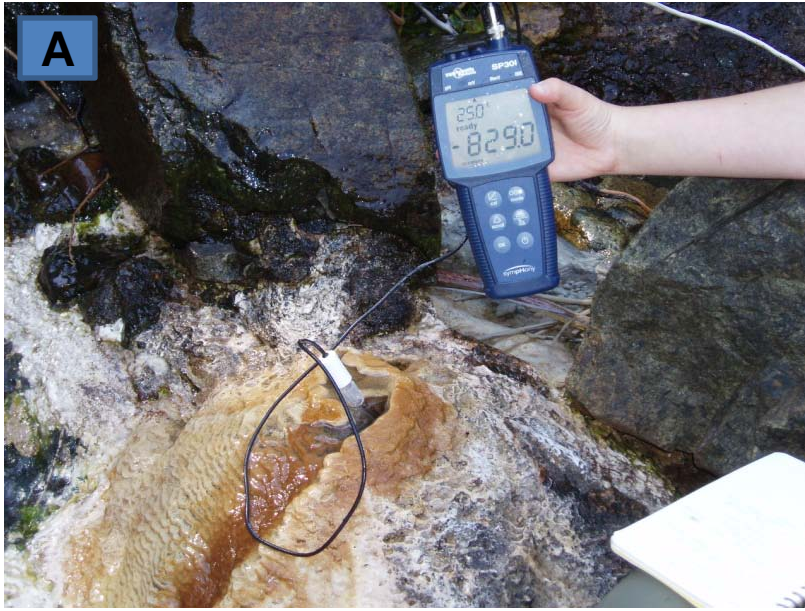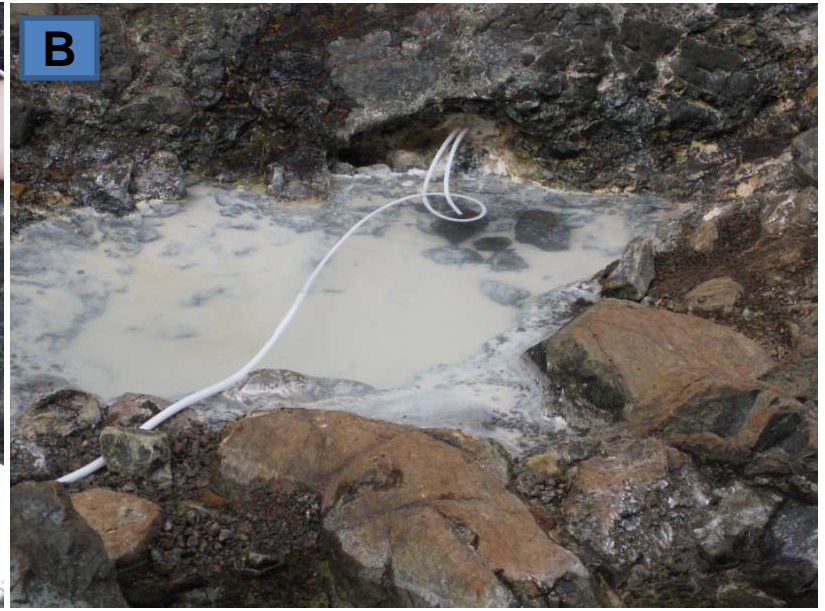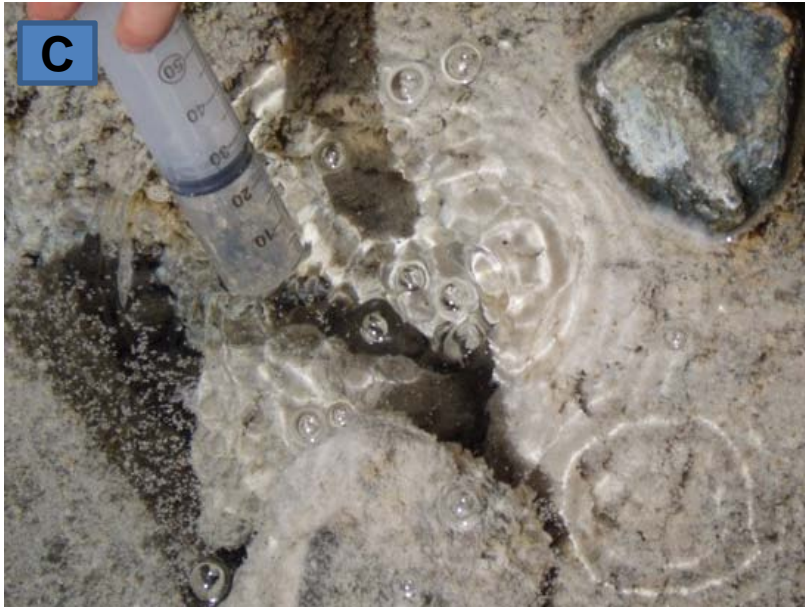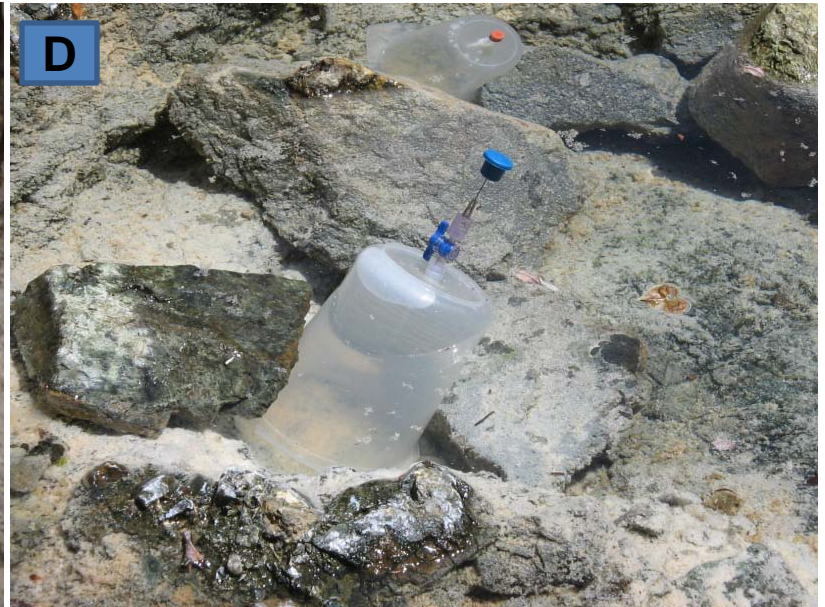

Supplement: mmc2 [file mmc2.pdf]
